# Supplementary material
Source: Research Square preprint supplement (doi:10.21203/rs.3.rs-8864800/v1)
Supplement: Supplementary file 1 [file 027910cb8dad7a1127192c0f.pdf]

Supplementary material 4 Interrupted Time Series analysis – cancer and non-cancer.

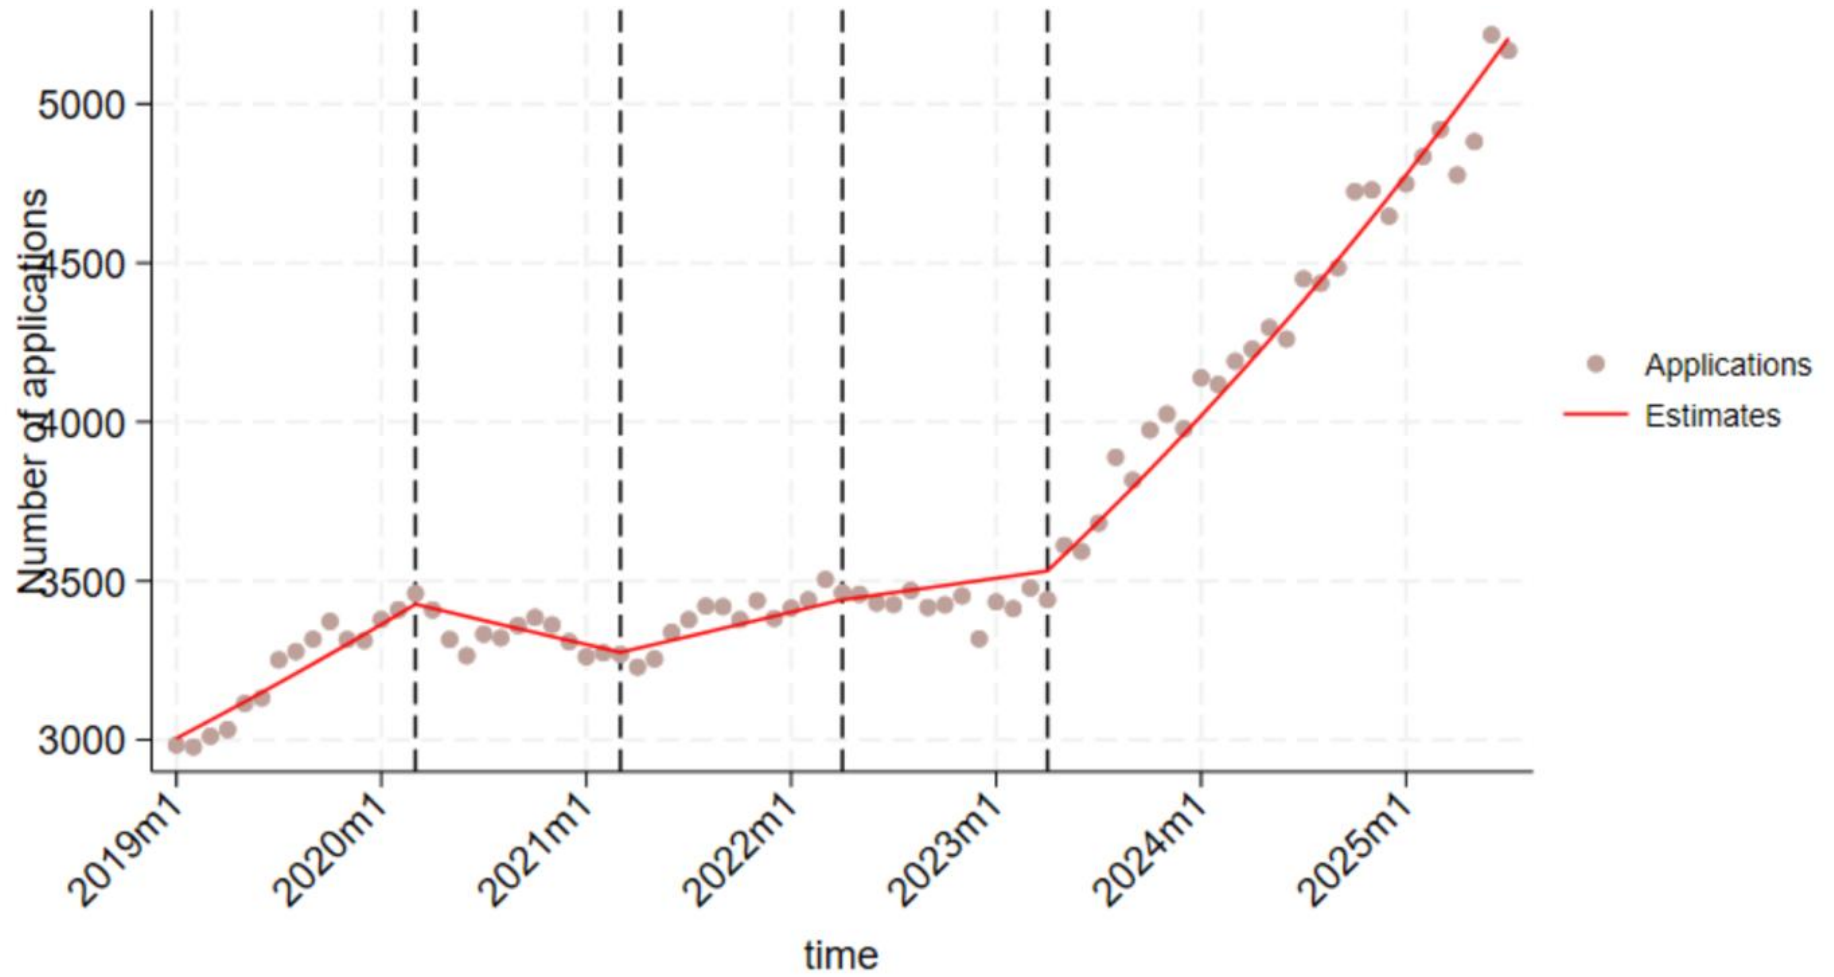

Cancer diagnoses

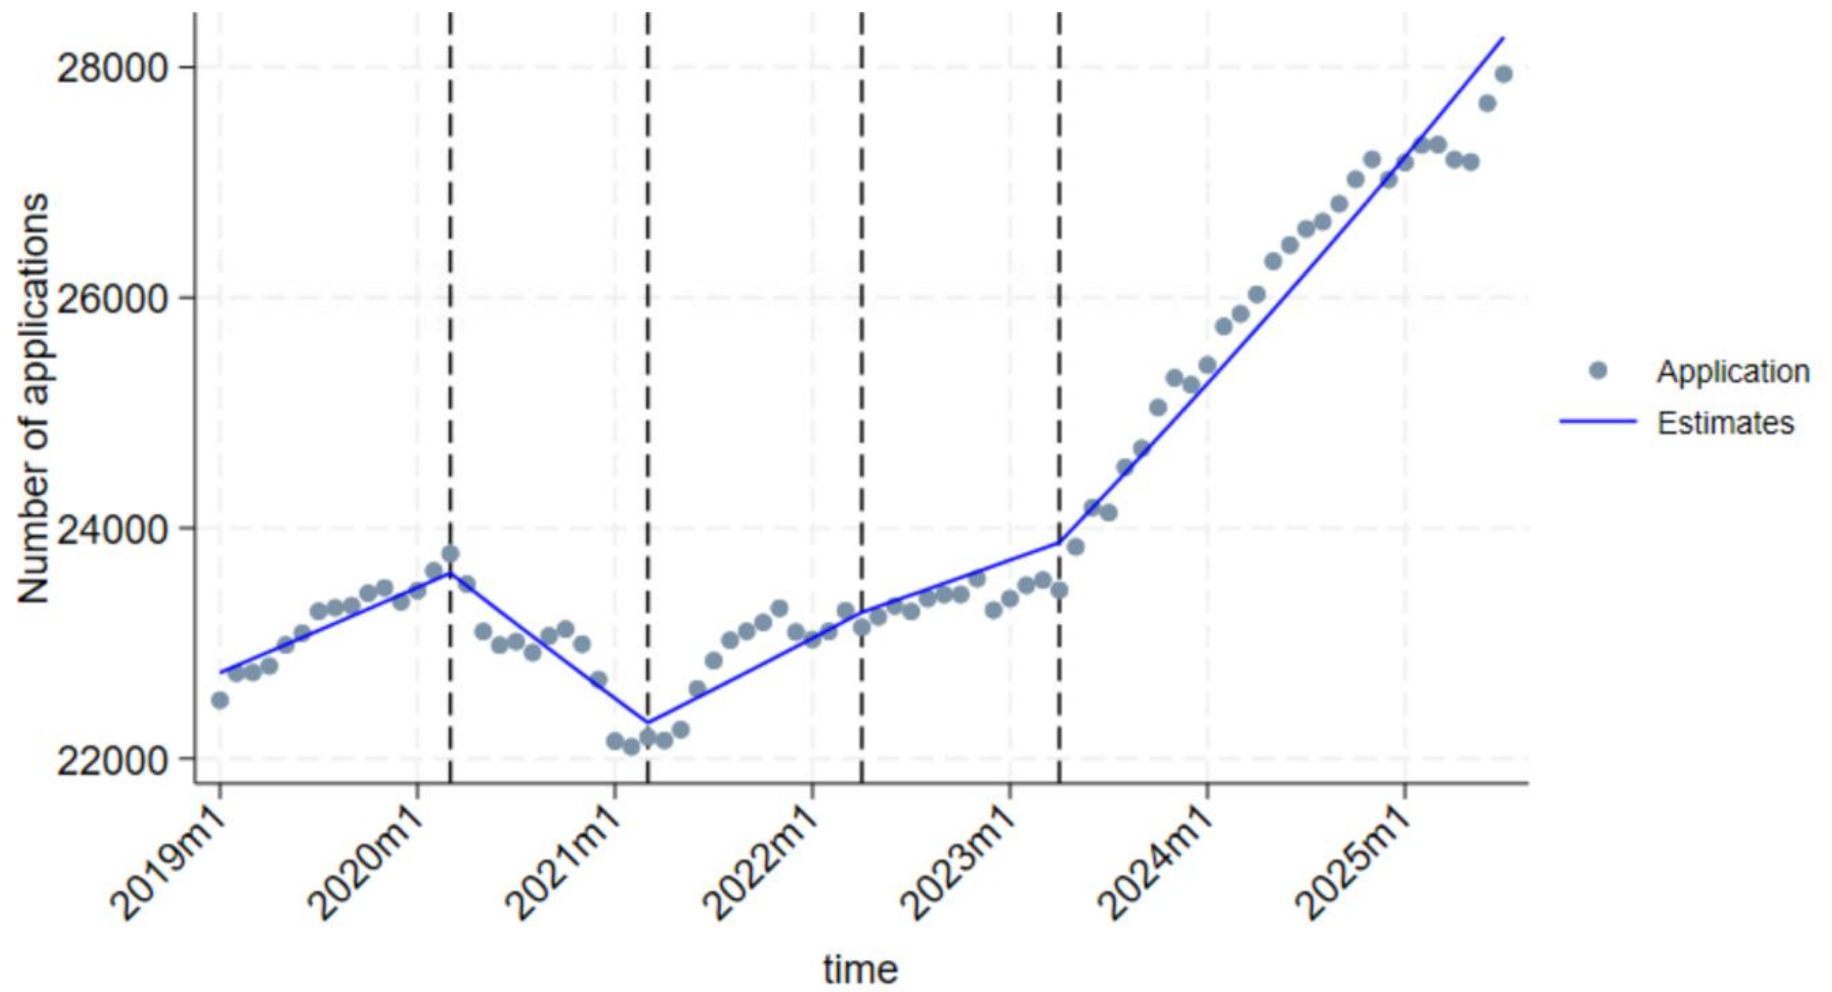

Non-cancer diagnoses
