# Supplementary material
Source: Research Square preprint supplement (doi:10.21203/rs.3.rs-8864800/v1)
Supplement: Supplementary file 2 [file 2b3be9ea9930fcc60bd88423.pdf]

Supplementary material 7 – Coefficient data

a. Global

| global_sensitivity | IRR      | OIM<br>std. err. | z       | P> z  | [95% conf. interval] |          |
|--------------------|----------|------------------|---------|-------|----------------------|----------|
| time1              | 1.003493 | .0003104         | 11.27   | 0.000 | 1.002884             | 1.004101 |
| time2bis           | .9953971 | .0003027         | -15.17  | 0.000 | .994804              | .9959905 |
| time23             | 1.003349 | .0002805         | 11.96   | 0.000 | 1.0028               | 1.003899 |
| time3              | 1.002109 | .0002675         | 7.89    | 0.000 | 1.001585             | 1.002634 |
| time4              | 1.007413 | .0001213         | 61.36   | 0.000 | 1.007175             | 1.007651 |
| cos_1              | 1.00235  | .0009564         | 2.46    | 0.014 | 1.000477             | 1.004226 |
| sin_1              | .993747  | .000962          | -6.48   | 0.000 | .9918633             | .9956343 |
| _cons              | 25660.93 | 82.4744          | 3158.90 | 0.000 | 25499.8              | 25823.09 |

b. Sex

| sex_sensitivity | IRR      | OIM<br>std. err. | z       | P> z  | [95% conf. interval] |          |
|-----------------|----------|------------------|---------|-------|----------------------|----------|
| time1           | 1.003969 | .0004491         | 8.86    | 0.000 | 1.003089             | 1.004849 |
| sex             |          |                  |         |       |                      |          |
| Female          | 1.1098   | .0070922         | 16.30   | 0.000 | 1.095986             | 1.123788 |
| sex#c.time1     |          |                  |         |       |                      |          |
| Female          | .9991294 | .0006159         | -1.41   | 0.158 | .997923              | 1.000337 |
| time2bis        | .9957303 | .0004379         | -9.73   | 0.000 | .9948724             | .9965888 |
| sex#c.time2bis  |          |                  |         |       |                      |          |
| Female          | .9993437 | .0006082         | -1.08   | 0.281 | .9981524             | 1.000536 |
| time23          | 1.003391 | .0004049         | 8.39    | 0.000 | 1.002597             | 1.004185 |
| sex#c.time23    |          |                  |         |       |                      |          |
| Female          | .9999174 | .0005594         | -0.15   | 0.883 | .9988217             | 1.001014 |
| time3           | 1.003225 | .0003851         | 8.39    | 0.000 | 1.00247              | 1.00398  |
| sex#c.time3     |          |                  |         |       |                      |          |
| Female          | .9978452 | .0005326         | -4.04   | 0.000 | .9968018             | .9988896 |
| time4           | 1.008    | .000173          | 46.42   | 0.000 | 1.007661             | 1.008339 |
| sex#c.time4     |          |                  |         |       |                      |          |
| Female          | .9988644 | .0002393         | -4.74   | 0.000 | .9983955             | .9993335 |
| cos_1           | 1.002327 | .0009564         | 2.44    | 0.015 | 1.000455             | 1.004204 |
| sin_1           | .9937643 | .0009621         | -6.46   | 0.000 | .9918804             | .9956517 |
| _cons           | 12160.08 | 56.49698         | 2024.47 | 0.000 | 12049.85             | 12271.31 |

c. lcd codes

| icd_sensitivity   | IRR      | OIM<br>std. err. | z      | P> z  | [95% conf. interval] |          |
|-------------------|----------|------------------|--------|-------|----------------------|----------|
| time1             | 1.009431 | .0008907         | 10.64  | 0.000 | 1.007687             | 1.011178 |
| 1.cancer          | 7.619753 | .0750292         | 206.24 | 0.000 | 7.474108             | 7.768236 |
| cancer#c.time1    |          |                  |        |       |                      |          |
| 1                 | .9933026 | .0009348         | -7.14  | 0.000 | .9914721             | .9951364 |
| time2bis          | .9962429 | .0008509         | -4.41  | 0.000 | .9945765             | .9979121 |
| cancer#c.time2bis |          |                  |        |       |                      |          |
| 1                 | .9990448 | .0009131         | -1.05  | 0.296 | .9972568             | 1.000836 |
| time23            | 1.003796 | .0007828         | 4.86   | 0.000 | 1.002263             | 1.005331 |
| cancer#c.time23   |          |                  |        |       |                      |          |
| 1                 | .9994504 | .0008349         | -0.66  | 0.510 | .9978154             | 1.001088 |
| time3             | 1.002162 | .0007383         | 2.93   | 0.003 | 1.000716             | 1.00361  |
| cancer#c.time3    |          |                  |        |       |                      |          |
| 1                 | .9999813 | .0007902         | -0.02  | 0.981 | .9984337             | 1.001531 |
| time4             | 1.014488 | .0003239         | 45.05  | 0.000 | 1.013854             | 1.015123 |
| cancer#c.time4    |          |                  |        |       |                      |          |
| 1                 | .9918984 | .0003414         | -23.64 | 0.000 | .9912296             | .9925678 |
| cos_1             | 1.002497 | .0009565         | 2.61   | 0.009 | 1.000624             | 1.004373 |
| sin_1             | .9937764 | .0009619         | -6.45  | 0.000 | .9918928             | .9956636 |
| _cons             | 2977.948 | 27.54119         | 864.91 | 0.000 | 2924.454             | 3032.419 |

d. Pension age

| pensionage_sensitivity                           | OIM      |           |        |       |                      |          |
|--------------------------------------------------|----------|-----------|--------|-------|----------------------|----------|
|                                                  | IRR      | std. err. | z      | P> z  | [95% conf. interval] |          |
| time1                                            | .9978266 | .0008986  | -2.42  | 0.016 | .9960669             | .9995895 |
| pensionage<br>Below state pension age            | 7.27817  | .0719393  | 200.81 | 0.000 | 7.138528             | 7.420543 |
| pensionage#c.time1<br>Below state pension age    | 1.00643  | .0009639  | 6.69   | 0.000 | 1.004543             | 1.008321 |
| time2bis                                         | 1.009384 | .0008751  | 10.77  | 0.000 | 1.00767              | 1.0111   |
| pensionage#c.time2bis<br>Below state pension age | .9842574 | .0009111  | -17.14 | 0.000 | .9824732             | .9860448 |
| time23                                           | 1.01426  | .0007573  | 18.96  | 0.000 | 1.012777             | 1.015746 |
| pensionage#c.time23<br>Below state pension age   | .9874755 | .0007952  | -15.65 | 0.000 | .9859182             | .9890353 |
| time3                                            | 1.011315 | .0006764  | 16.82  | 0.000 | 1.00999              | 1.012642 |
| pensionage#c.time3<br>Below state pension age    | .9892089 | .0007214  | -14.88 | 0.000 | .987796              | .9906239 |
| time4                                            | 1.013801 | .0002853  | 48.70  | 0.000 | 1.013242             | 1.01436  |
| pensionage#c.time4<br>Below state pension age    | .99229   | .0003084  | -24.91 | 0.000 | .9916858             | .9928946 |
| cos_1                                            | 1.002448 | .0009565  | 2.56   | 0.010 | 1.000575             | 1.004325 |
| sin_1                                            | .9936037 | .0009619  | -6.63  | 0.000 | .9917201             | .9954907 |
| _cons                                            | 3100.242 | 28.8031   | 865.31 | 0.000 | 3044.299             | 3157.212 |

e. Location

| apps_                    | OIM      |           |        |       |                      |          |
|--------------------------|----------|-----------|--------|-------|----------------------|----------|
|                          | IRR      | std. err. | z      | P> z  | [95% conf. interval] |          |
| time1                    | 1.006114 | .0009748  | 6.29   | 0.000 | 1.004205             | 1.008027 |
| location                 |          |           |        |       |                      |          |
| East Midlands            | .7855259 | .011949   | -15.87 | 0.000 | .7624521             | .8092981 |
| East of England          | .9345201 | .0136239  | -4.65  | 0.000 | .9081956             | .9616076 |
| North East               | .607194  | .0099874  | -30.33 | 0.000 | .5879312             | .6270879 |
| North West               | 1.637463 | .0209752  | 38.50  | 0.000 | 1.596864             | 1.679094 |
| South East               | 1.324423 | .0177002  | 21.02  | 0.000 | 1.290182             | 1.359573 |
| South West               | .8920844 | .0131341  | -7.76  | 0.000 | .8667099             | .9182017 |
| Wales                    | .6473842 | .0104374  | -26.97 | 0.000 | .627247              | .6681679 |
| West Midlands            | 1.071871 | .01514    | 4.91   | 0.000 | 1.042604             | 1.101959 |
| Yorkshire and The Humber | 1.169149 | .0160589  | 11.38  | 0.000 | 1.138095             | 1.201052 |
| location#c.time1         |          |           |        |       |                      |          |
| East Midlands            | .9987958 | .0014615  | -0.82  | 0.410 | .9959355             | 1.001664 |
| East of England          | .995203  | .0014008  | -3.42  | 0.001 | .9924614             | .9979523 |
| North East               | .9974177 | .0015804  | -1.63  | 0.103 | .9943249             | 1.00052  |
| North West               | .997649  | .0012293  | -1.91  | 0.056 | .9952424             | 1.000061 |
| South East               | .9984774 | .0012832  | -1.19  | 0.236 | .9959655             | 1.000996 |
| South West               | .9968118 | .001413   | -2.25  | 0.024 | .9940462             | .9995851 |
| Wales                    | .9976032 | .0015491  | -1.55  | 0.122 | .9945717             | 1.000644 |
| West Midlands            | .9924357 | .0013562  | -5.56  | 0.000 | .9897811             | .9950974 |
| Yorkshire and The Humber | .99916   | .0013199  | -0.64  | 0.525 | .9965765             | 1.00175  |
| time2bis                 | .9924545 | .0009494  | -7.92  | 0.000 | .9905954             | .994317  |
| location#c.time2bis      |          |           |        |       |                      |          |
| East Midlands            | 1.00225  | .001447   | 1.56   | 0.119 | .9994183             | 1.005091 |
| East of England          | 1.000128 | .0013996  | 0.09   | 0.927 | .9973883             | 1.002875 |
| North East               | 1.002791 | .0015682  | 1.78   | 0.075 | .9997216             | 1.005869 |
| North West               | 1.006051 | .0012209  | 4.97   | 0.000 | 1.003661             | 1.008447 |
| South East               | 1.004514 | .0012711  | 3.56   | 0.000 | 1.002026             | 1.007008 |
| South West               | 1.007179 | .001403   | 5.14   | 0.000 | 1.004433             | 1.009933 |
| Wales                    | 1.002809 | .0015381  | 1.83   | 0.067 | .999799              | 1.005828 |
| West Midlands            | 1.001322 | .0013647  | 0.97   | 0.332 | .9986511             | 1.004001 |
| Yorkshire and The Humber | 1.00043  | .0013056  | 0.33   | 0.742 | .9978743             | 1.002992 |
| time23                   | 1.003143 | .0008894  | 3.54   | 0.000 | 1.001401             | 1.004888 |
| location#c.time23        |          |           |        |       |                      |          |
| East Midlands            | .9989399 | .0013329  | -0.79  | 0.427 | .9963308             | 1.001556 |
| East of England          | 1.001953 | .001297   | 1.51   | 0.132 | .999414              | 1.004498 |
| North East               | 1.00282  | .0014403  | 1.96   | 0.050 | 1.000001             | 1.005647 |
| North West               | .9984224 | .0011182  | -1.41  | 0.159 | .9962333             | 1.000616 |
| South East               | 1.000339 | .0011662  | 0.29   | 0.771 | .9980558             | 1.002627 |
| South West               | 1.001039 | .0012779  | 0.81   | 0.416 | .9985375             | 1.003547 |
| Wales                    | .9993403 | .0014161  | -0.47  | 0.641 | .9965687             | 1.00212  |
| West Midlands            | .9983163 | .0012631  | -1.33  | 0.183 | .9958437             | 1.000795 |
| Yorkshire and The Humber | 1.001978 | .0012085  | 1.64   | 0.101 | .9996121             | 1.004349 |
| time3                    | .9985654 | .0008522  | -1.68  | 0.093 | .9968965             | 1.000237 |

|                          |          |          |        |       |          |          |
|--------------------------|----------|----------|--------|-------|----------|----------|
| time3                    | .9985654 | .0008522 | -1.68  | 0.093 | .9968965 | 1.000237 |
| location#c.time3         |          |          |        |       |          |          |
| East Midlands            | 1.006219 | .0012836 | 4.86   | 0.000 | 1.003706 | 1.008738 |
| East of England          | 1.001885 | .0012434 | 1.52   | 0.129 | .9994506 | 1.004325 |
| North East               | 1.003714 | .0013747 | 2.71   | 0.007 | 1.001023 | 1.006412 |
| North West               | 1.003849 | .0010797 | 3.57   | 0.000 | 1.001735 | 1.005967 |
| South East               | 1.005743 | .0011211 | 5.14   | 0.000 | 1.003548 | 1.007943 |
| South West               | 1.006204 | .0012264 | 5.07   | 0.000 | 1.003803 | 1.008611 |
| Wales                    | 1.002937 | .0013642 | 2.16   | 0.031 | 1.000267 | 1.005615 |
| West Midlands            | 1.00411  | .0012195 | 3.38   | 0.001 | 1.001723 | 1.006503 |
| Yorkshire and The Humber | 1.000815 | .0011599 | 0.70   | 0.482 | .9985444 | 1.003091 |
| time4                    | 1.008635 | .0003882 | 22.34  | 0.000 | 1.007875 | 1.009396 |
| location#c.time4         |          |          |        |       |          |          |
| East Midlands            | .999882  | .0005698 | -0.21  | 0.836 | .9987658 | 1.000999 |
| East of England          | .9982885 | .0005592 | -3.06  | 0.002 | .997193  | .9993852 |
| North East               | .9981807 | .0006152 | -2.95  | 0.003 | .9969756 | .9993873 |
| North West               | .999024  | .0004834 | -2.02  | 0.044 | .9980769 | .999972  |
| South East               | .9998835 | .0004992 | -0.23  | 0.815 | .9989056 | 1.000862 |
| South West               | .9963158 | .0005476 | -6.72  | 0.000 | .9952432 | .9973897 |
| Wales                    | .9985647 | .0006121 | -2.34  | 0.019 | .9973658 | .999765  |
| West Midlands            | 1.000149 | .0005444 | 0.27   | 0.784 | .9990828 | 1.001217 |
| Yorkshire and The Humber | .9969616 | .0005238 | -5.79  | 0.000 | .9959355 | .9979888 |
| cos_1                    | 1.002376 | .0009569 | 2.49   | 0.013 | 1.000502 | 1.004253 |
| sin_1                    | .9937608 | .0009625 | -6.46  | 0.000 | .9918762 | .995649  |
| _cons                    | 2545.532 | 25.66518 | 777.80 | 0.000 | 2495.723 | 2596.335 |
