# Supplementary material
Source: Research Square preprint supplement (doi:10.21203/rs.3.rs-8864800/v1)

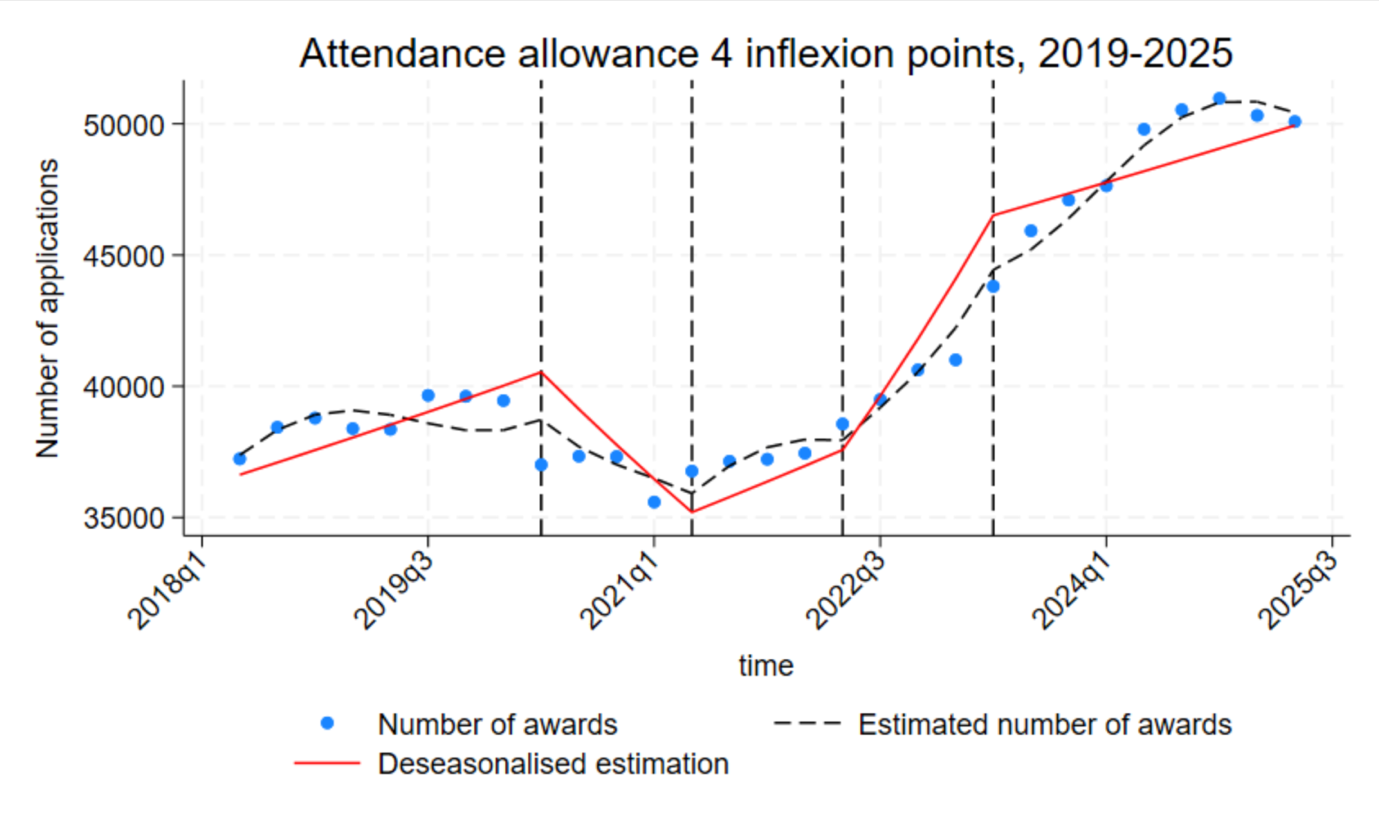


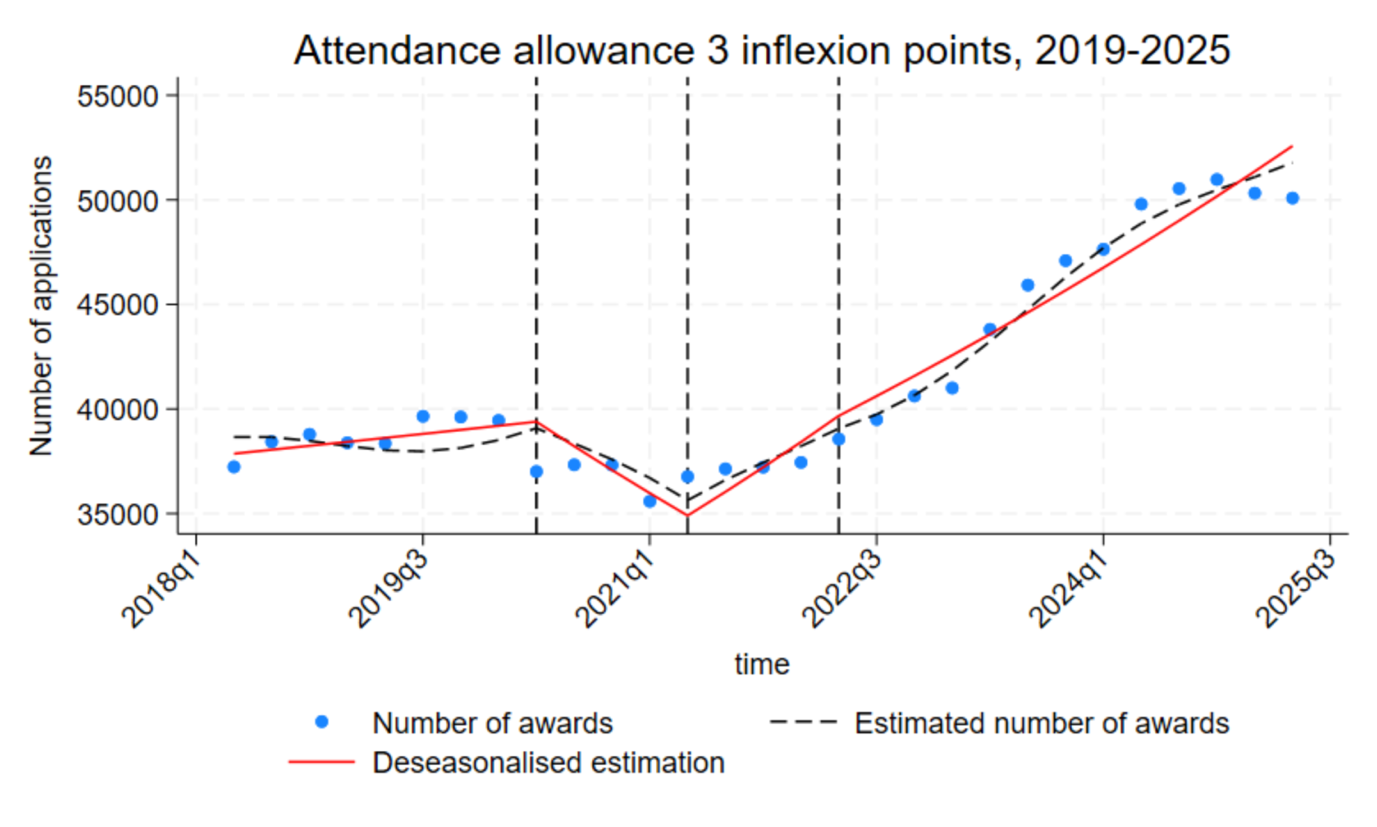


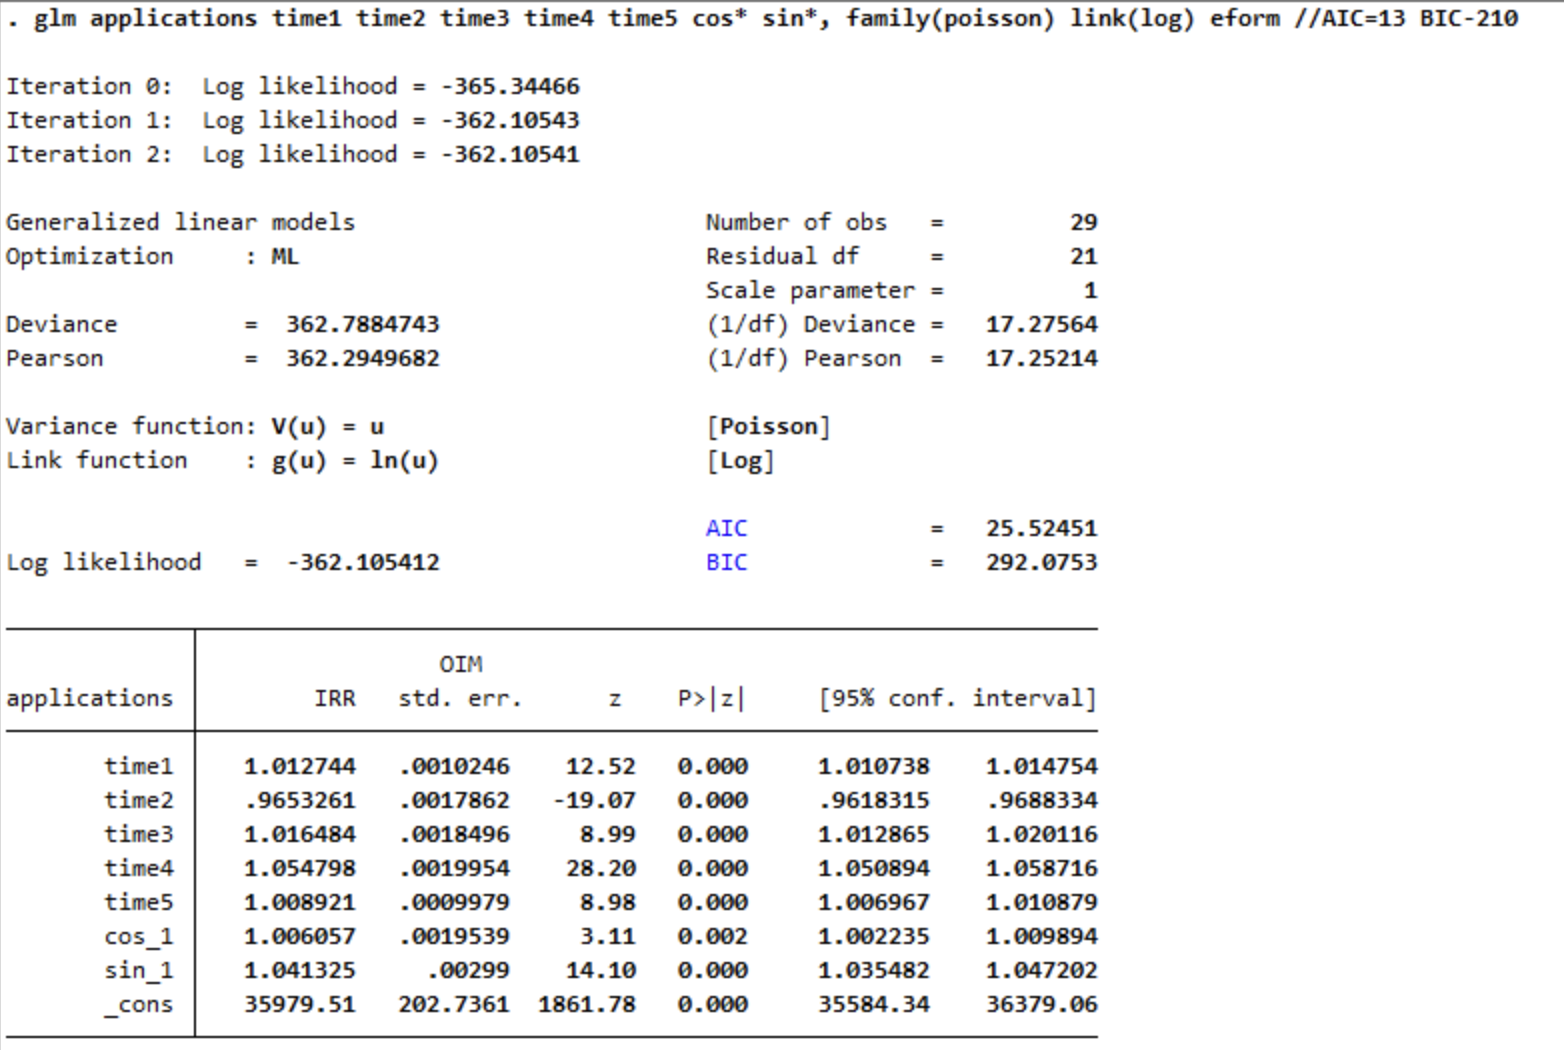


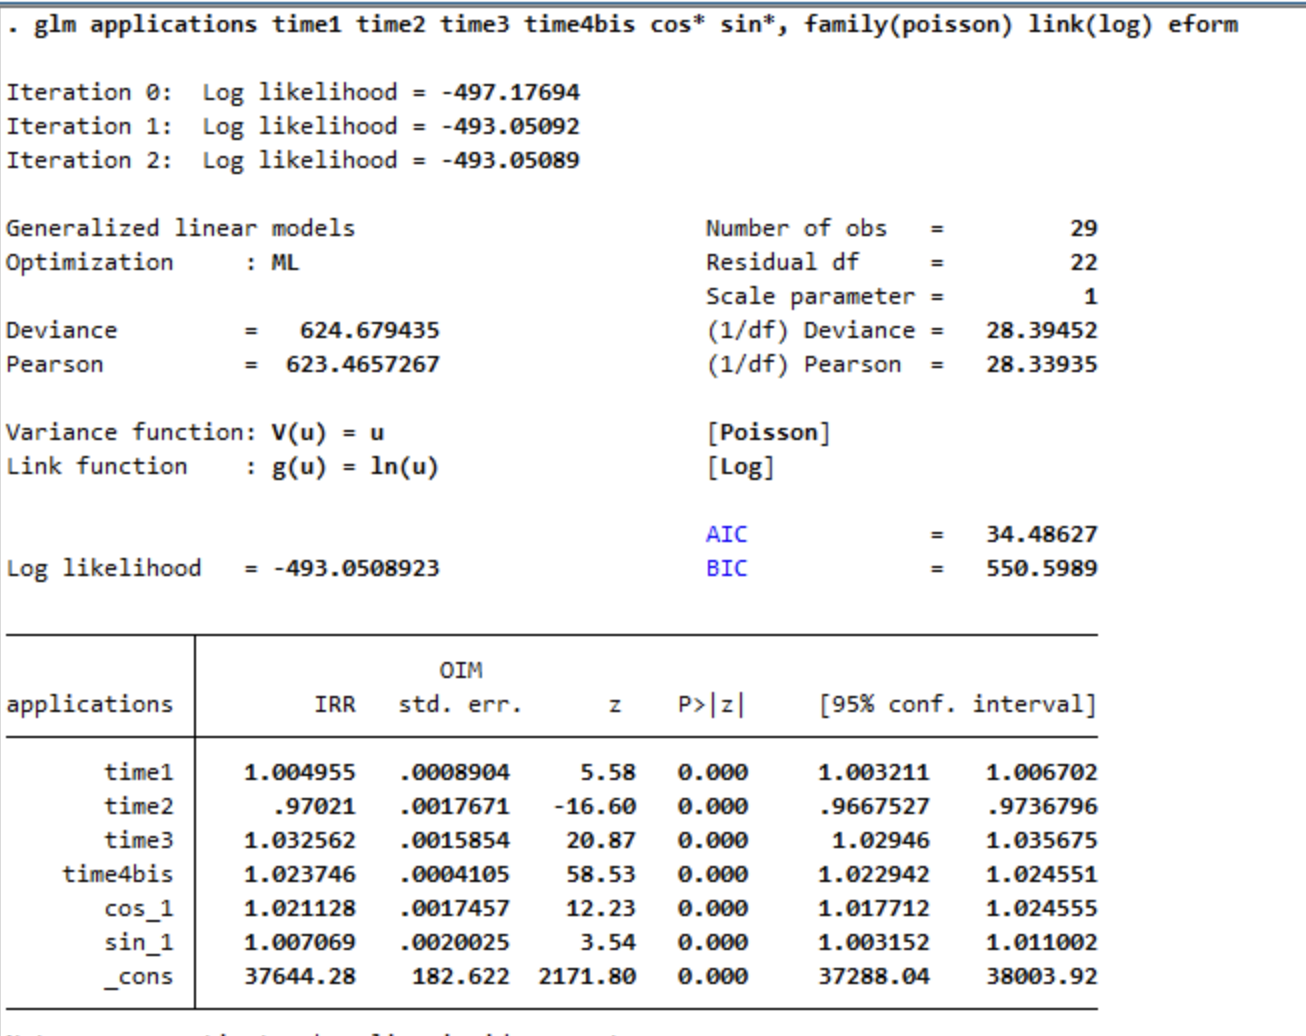


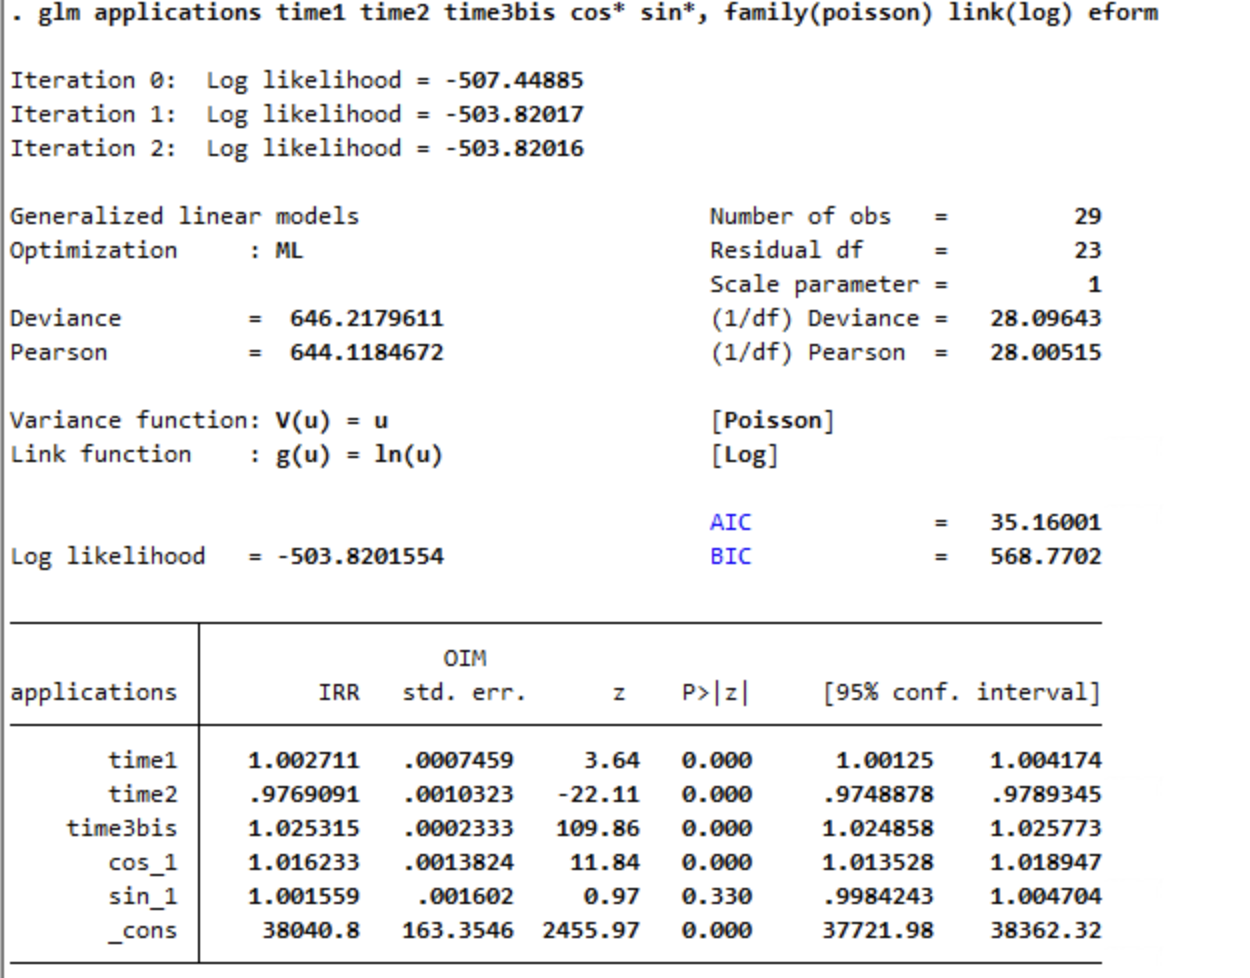


In the 4 inflexion point model, the last trend (after the implementation period) (0.9% monthly increase) is smaller than the baseline trend (before COVID) (1.3% monthly increase).

When we remove the implementation period and focus only on the impact of the change, there is little difference between the post-COVID trend and the trend after the change in regulation.


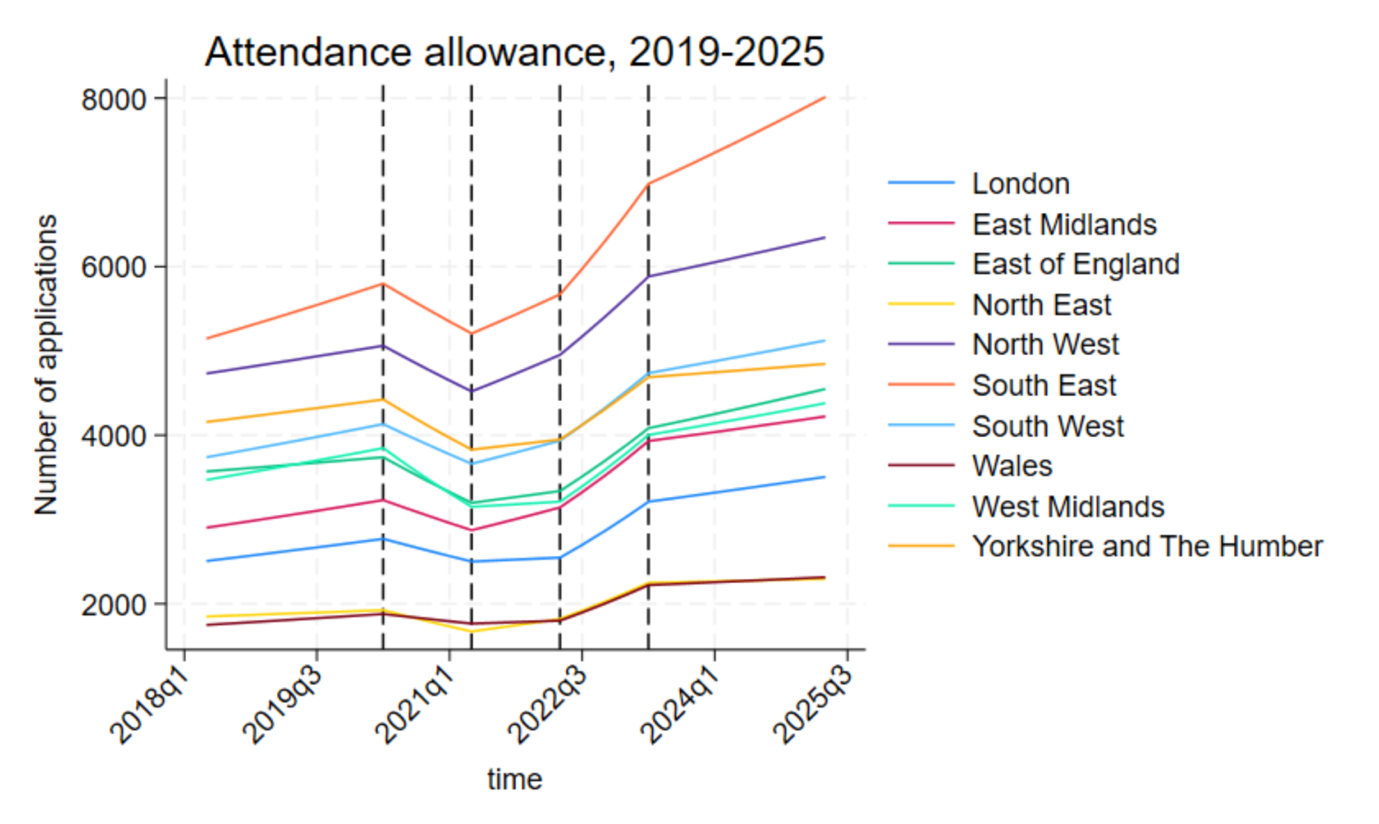

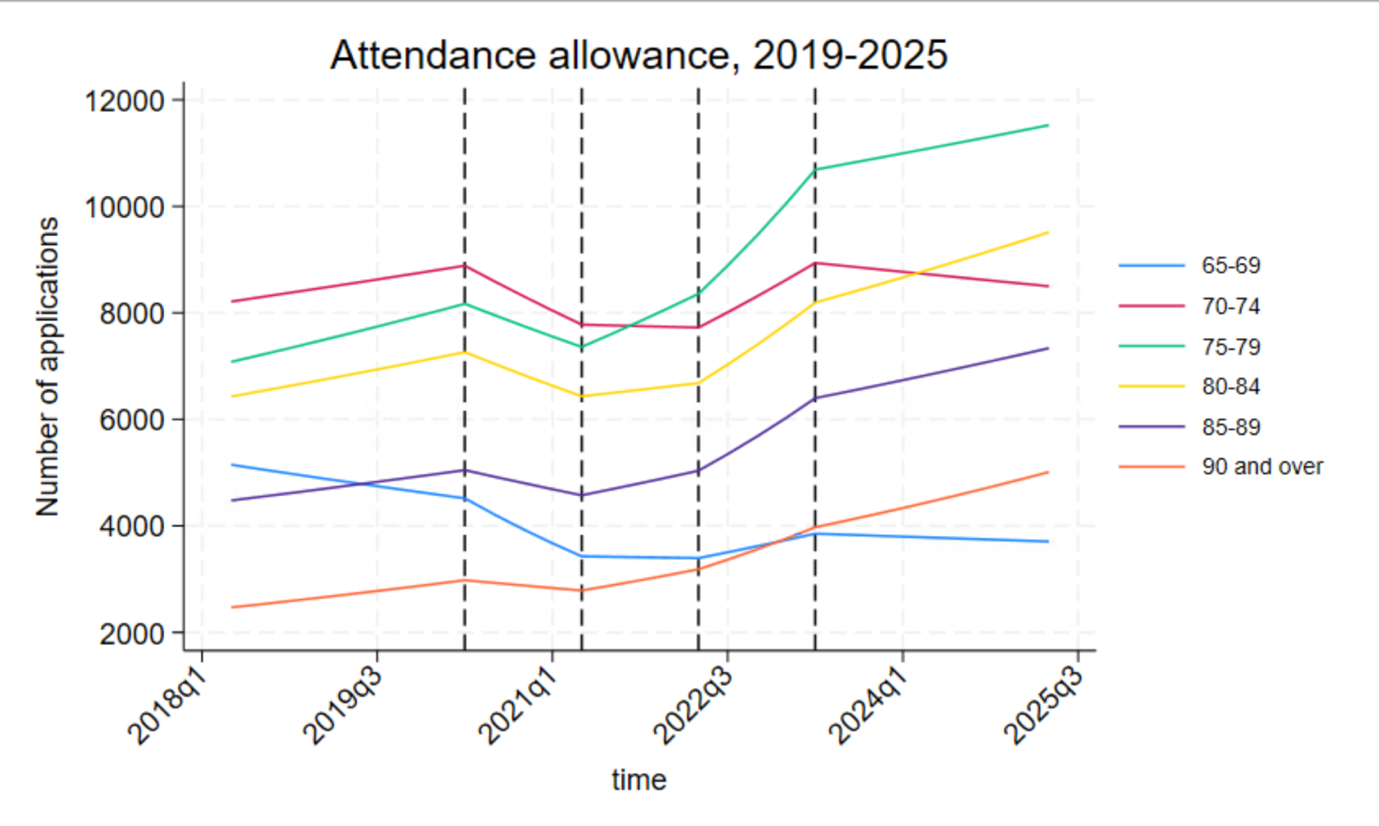

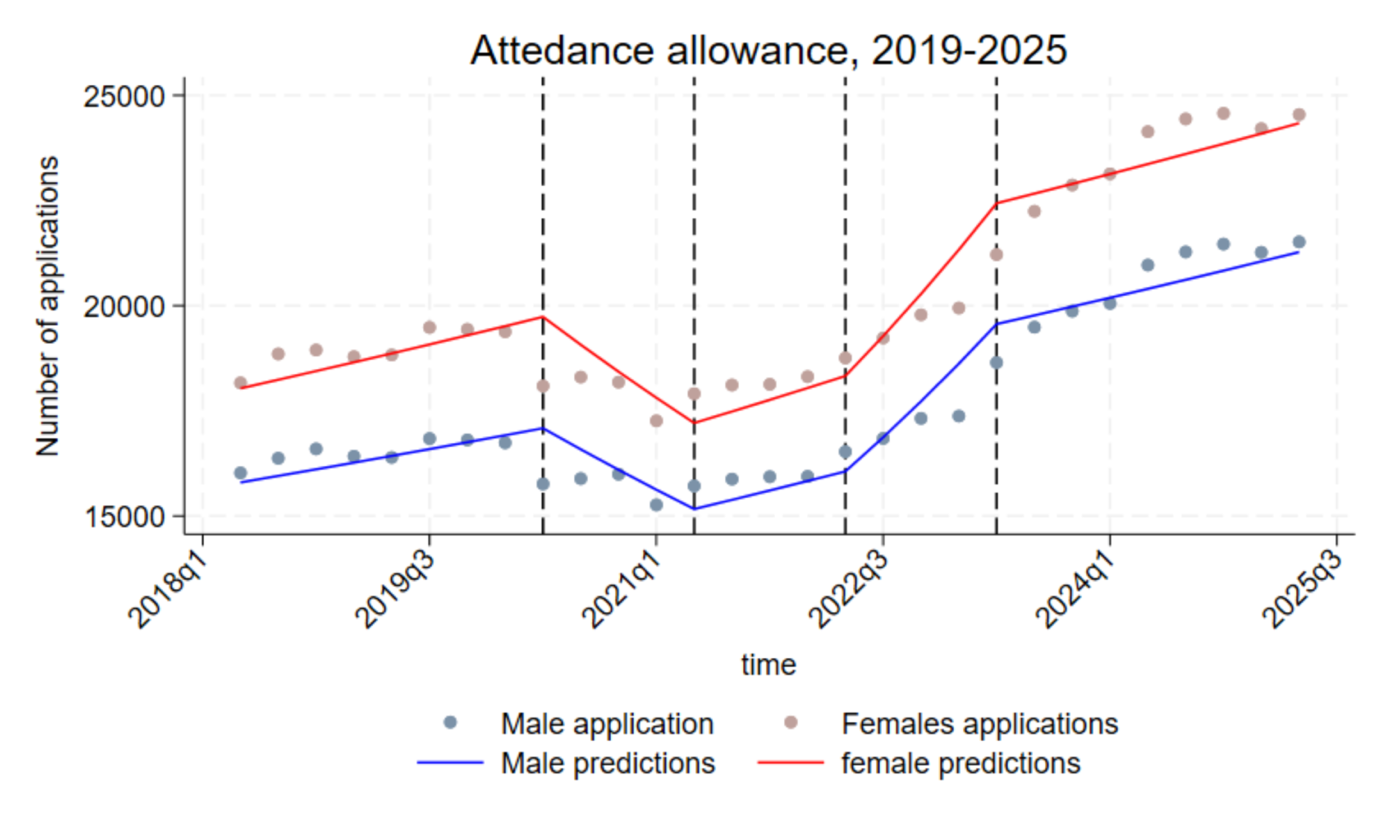

Supplement: Supplementary file 3 [file 39e70312c0c6bfb1d3a14f3f.docx]
