# Supplementary material
Source: Research Square preprint supplement (doi:10.21203/rs.3.rs-8864800/v1)
Supplement: Supplementary file 4 [file 3e354692cfcaa5eca4c3f18c.docx]

**Supplementary material**

1. **ITS models for SREL caseloads**

Here is the hypothesised unadjusted segmented regression model for SREL caseloads:

[Model 1]

Where *i* represents the time (in months), is the before covid pandemic slope, is the slope during the pandemic period, is the before-change/after any covid-related measure slope, is the post-change/implementation slope, is the post-implementation slope. We included a robust variance estimator to adjust for overdispersion. We also included Fourier terms to adjust for seasonality and autocorrelation.

| Stata code:   - Segment specification   Time_i = max(0,min(_n-start_period_i, end_period_i - start_period_i)   - Fourier terms:   gen degrees = (time/12)*360  fourier degrees, n(1)   - Model specification   glm apps time1 time2 time3 time4 time5 cos sin, family(poisson) link(log) vce(robust) eform |
| --- |

Table1 shows the β estimates for the adjusted model (all caseloads).

Table 1. Interrupted time series estimates for the effect of the regulatory change on SREL caseloads (on a monthly basis)

|  | Global | | Sex | | | | Cancer | | | | Pension age | | | |
| --- | --- | --- | --- | --- | --- | --- | --- | --- | --- | --- | --- | --- | --- | --- |
|  |  |  | Male | | Female | | Non cancer | | Cancer | | State pension age | | Below pension age | |
|  | β | 95%CI | β | 95%CI | β | 95%CI | β | 95%CI | β | 95%CI | β | 95%CI | β | 95%CI |
| Before covid ( | 1.003 | [1.003; 1.004] | 1.004 | [1.003, 1.005] | 1.003 | [1.001, 1.005] | 1.009 | [1.008, 1.011] | 1.003 | [1.000, 1.005] | 0.998 | [0.996, 1.000] | 1.004 | [1.000, 1.008] |
| During covid ( | 0.995 | [0.995; 0.996] | 0.996 | [0.995, 0.997] | 0.995 | [0.993, 0.997] | 0.996 | [0.995, 0.997] | 0.995 | [0.993, 0.998] | 1.009 | [1.007, 1.012] | 0.993 | [0.989, 0.998] |
| Post covid ( | 1.003 | [1.003; 1.004] | 1.003 | [1.003, 1.004] | 1.003 | [1.002, 1.005] | 1.004 | [1.003, 1.005] | 1.003 | [1.001, 1.006] | 1.014 | [1.012, 1.016] | 1.002 | [0.998, 1.005] |
| Implementation ( | 1.002 | [1.002; 1.003] | 1.003 | [1.003, 1.004] | 1.001 | [1.000, 1.003] | 1.002 | [1.001, 1.004] | 1.002 | [1.000, 1.005] | 1.011 | [1.010, 1.013] | 1.000 | [0.997, 1.003] |
| Post implementation ( | 1.007 | [1.007; 1.008] | 1.008 | [1.008, 1.008] | 1.007 | [1.006, 1.008] | 1.014 | [1.014, 1.015] | 1.006 | [1.005, 1.008] | 1.014 | [1.013, 1.014] | 1.006 | [1.005, 1.007] |
| Cosinus term | 1.002 | [1.000; 1.004] | 1.002 | [1.000, 1.004] | 1.002 | [1.000, 1.004] | 1.002 | [1.000, 1.005] | 1.002 | [1.000, 1.005] | 1.000 | [1.000, 1.005] | 1.002 | [1.000, 1.005] |
| Sinus term | 0.994 | [0.992; 0.996] | 0.994 | [0.992, 0.996] | 0.994 | [0.992, 0.996] | 0.994 | [0.991, 0.996] | 0.994 | [0.991, 0.996] | 0.994 | [0.991, 0.996] | 0.994 | [0.991, 0.996] |

In the article, the annual rate (Table 2) is calculated as ( 12-1)*100. For example, for the variable “before covid”, which represents the slope before any lockdown, the AR = ( 12 -1)*100= (1.00312 -1)=4.27%.

1. **ITS model for Attendance Allowance**

Here is the hypothesised unadjusted segmented regression model for attendance allowance caseloads:

[Model 2]

Where i represents the time (in quarters), is the before covid pandemic slope, is the slope during the pandemic period, is the before-change/after any covid-related measure slope, is the post-change/implementation slope, is the post-implementation slope. Since the outcome did not follow a Poisson distribution, we included a robust variance estimator to account for overdispersion. We also included Fourier terms to adjust for seasonality and autocorrelation.

Table2 shows the β estimates for the adjusted model (all caseloads). Figure A is a graphical representation of the adjusted model.

Table 2. Interrupted time series estimates for the effect of the regulatory change on Attendance allowance caseloads (on a quarterly basis)

| Variable | β | 95% CI |
| --- | --- | --- |
| Before covid ( | 1.013 | [1.006; 1.019] |
| During covid ( | 0.965 | [0.950; 0.981] |
| Post covid ( | 1.016 | [1.002; 1.031] |
| Implementation ( | 1.055 | [1.043; 1.067] |
| Post implementation ( | 1.009 | [1.004; 1.014] |
| Cosinus term | 1.006 | [0.992; 1.010] |
| Sinus term | 1.041 | [1.035; 1.047] |
| Intercept ( | 35979.510 | [35584.340; 36379.060] |

The annual rate is calculated here as ( 4-1)*100. For example, for the variable “before covid” in [Model 1], which represents the slope before any lockdown, the AC = ( 4 -1)*100= (1.0134 -1)=5.20%.


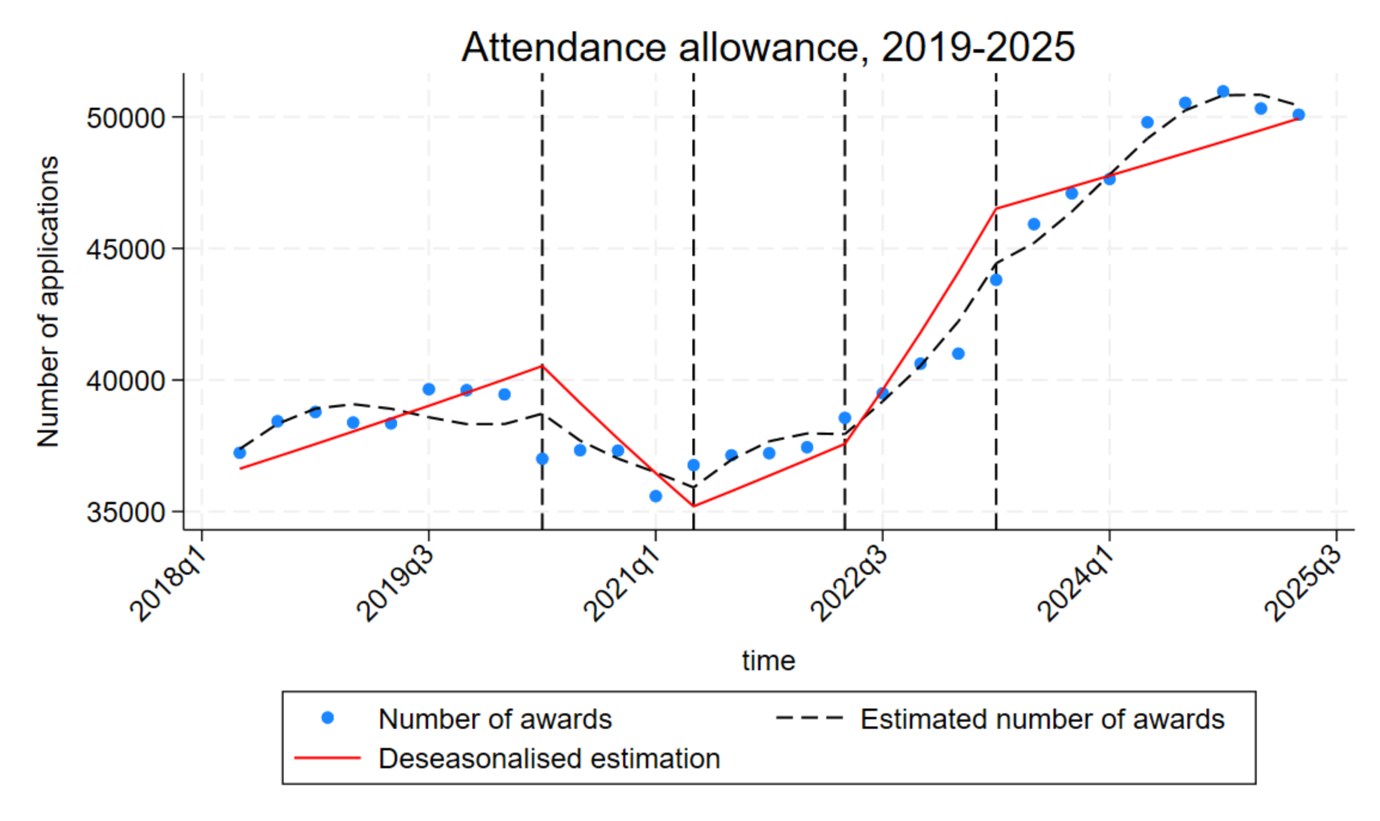


1. **Limitations**

[Model 2] was fitted using data available only at quarterly intervals, which restricted the number of time points modelled to 29 and reduced statistical power. As a result, estimates from [Model 2] should be interpreted with caution, and any changes identified should be considered on a quarterly basis. In contrast, [Model 1] is more robust, having been fitted using monthly data. With 79 data points, [Model 1] allows for a more precise approximation and control of seasonal patterns. Consequently, direct comparisons between [Model 1] and [Model 2] are not appropriate.
