# Supplementary material
Source: Research Square preprint supplement (doi:10.21203/rs.3.rs-8864800/v1)
Supplement: Supplementary file 5 [file 65d349312dac037dee3f4d1d.docx]

**Supplementary file 9: Calculations based on mortality and prognostic accuracy data**

| **Overall calculations of mortality within 6 and 12 months (data from:**  https://www.ons.gov.uk/peoplepopulationandcommunity/birthsdeathsandmarriages/deaths/datasets/deathsregisteredsummarystatisticsenglandandwales) | | | | | | | | | |
| --- | --- | --- | --- | --- | --- | --- | --- | --- | --- |
|  | There are: | 581,363 | | deaths in England and Wales in 2023, of which: | 3,281 | were 15 or under, so that's: | **578,082** | adult deaths | |
| 1 | Will die in<6m | **289,041** | | (total adult deaths/2) |  |  |  |  | |
| 2 | Will die in <12m | **578,082** | | (total adult deaths) |  |  |  |  | |
|  |  |  | |  |  |  |  |  | |
|  | Of these: | 80% | | die from a serious illness, so on a given day, the total number of people eligible for SREL in a world of perfect prognosis is: | | | | | |
| 3 | Will die in<6m | **231,233** | | (80% of #1) |  |  |  |  | |
| 4 | Will die in <12m | **462,466** | | (80% of #2) |  |  |  |  | |
|  |  |  | |  |  |  |  |  | |
|  | Not everyone goes to the GP or other clinical engagements even at EOL | | | | | |  |  | |
|  | If | 80% | | of these go to the GP at least once in the timeframe (6m/12m) then the total number of those who are ill and are near EOL who could plausibly get referred for the benefit is: | | | | | |
| 5 | Will die in<6m | **507** | | per day (80% #3 / 365) | **15,204** | per month (day rate * 30) | **182,452** | per year (month rate * 12) | |
| 6 | Will die in <12m | **1,014** | | per day (80% #4 / 365) | **30,409** | per month (day rate * 30) | **364,904** | per year (month rate * 12) | |
|  |  |  | |  |  |  |  |  | |
|  | If clinicians have | 75% | | accuracy for 6 months | 70% | accurate for 12 months, then they will **correctly refer for SREL:** | | | |
| 7 | Will die in<6m | **380** | | per day (75% #5) | **11,403** | per month (day rate * 30) | **136,839** | per year (month rate * 12) | |
| 8 | Will die in <12m | **710** | | per day (70% #6) | **21,286** | per month (day rate * 30) | **255,433** | per year (month rate * 12) | |
|  |  |  | |  |  |  |  |  | |
|  | And they will see in clinical practice people who should be eligible (i.e. are ill and near EOL) but **incorrectly not refer for SREL**: | | | | | | | |  |
| 9 | Will die in<6m | **127** | | per day (#5 - #7) | **3,801** | per month (month #5 – month #7) | **45,613** | per year (year #5 – year #7) | |
| 10 | Will die in <12m | **304** | | per day (#6 - #8) | **9,123** | per month (month #6 – month #8) | **109,471** | per year (year #6 – year #8) | |
|  |  |  | |  |  |  |  |  | |
| Additionally, there will be **false positives** - people deemed to be end-of-life but who are not. | | | | | | | | | |
| 11 | There are an additional: | 1,156,164 | who are in the last (#1 * (3-1)) | | 3 | years of life but not the last year |  |  | |
|  | If | 70% | | go to the GP, and if clinicians again have (figure estimated as healthcare use is less when not in last year of life) | | | | | |
|  |  | 75% | | accuracy at 6 months and | 70% | accuracy at 12 months |  |  | |
| clinicians will **incorrectly refer for SREL:** | | | | |  |  |  |  | |
| 12 | Expected to die<6m, but don’t | **634** | | per day (70% of #11 * (1-75%) / 365) | **19,005** | per month (day rate * 30) | **228,065** | per year (month rate * 12) | |
| 13 | Expected to die<12m, but don't | **760** | | per day (70% of #11 * (1-70%) / 365) | **22,807** | per month (day rate * 30) | **273,678** | per year (month rate * 12) | |
|  |  |  | |  |  |  |  |  | |
| **This gives a total estimated number of referrals to SREL as** | | | | | | | | | |
| 14 | Expected to die<6m | **934** | | per day (#7 + #12) | **28,033** | per month (month #7 + month #12) | **336,396** | per year (year #7 + year #12) | |
| 15 | Expected to die<12m | **1,375** | | per day (#8 + #13) | **41,242** | per month (month #8 + month #13) | **494,902** | per year (year #8 + year #13) | |
| Proportions *ex post* eligible, i.e. received the benefit and died within the timeframe: | | | | |  |  |  |  | |
|  | In last 6 months of life | **41%** | | #7 / #14 |  |  |  |  | |
|  | In last year of life | **52%** | | #8 / #15 |  |  |  |  | |
