# Supplementary material
Source: Research Square preprint supplement (doi:10.21203/rs.3.rs-8864800/v1)
Supplement: Supplementary file 6 [file 6ac6727397008450f0510ab8.docx]

Supplementary material 2. Monthly percentage change in SREL application awards by sex, ICD codes (cancer vs. non-cancer conditions) and age (below pension age vs. pension age)

|  | Global | Sex | | ICD codes | | Age | |
| --- | --- | --- | --- | --- | --- | --- | --- |
|  |  | Men | Women | Non cancer | Cancer | Pension age | Below pension age |
| Baseline/ before Covid | 0.35% | 0.40% | 0.31% | 0.94% | 0.27% | -0.22% | 0.42% |
| Covid | -0.46% | -0.43% | -0.49% | -0.38% | -0.47% | 0.94% | -0.65% |
| Between Covid and change | 0.33% | 0.34% | 0.33% | 0.38% | 0.32% | 1.43% | 0.16% |
| Implementation period | -0.21% | 0.32% | 0.11% | -0.22% | 0.21% | 1.13% | 0.04% |
| After implementation | 0.74% | 0.80% | 0.69% | 1.45% | 0.63% | 1.38% | 0.60% |
