# Supplementary material
Source: Research Square preprint supplement (doi:10.21203/rs.3.rs-8864800/v1)
Supplement: Supplementary file 7 [file 6b5cba48d10da0034c2276eb.docx]

Supplementary material 3. Monthly percentage change in SREL application awards by location

|  | Location | | | | | | | | | |
| --- | --- | --- | --- | --- | --- | --- | --- | --- | --- | --- |
|  | London | East Midlands | East of England | North East | North West | South East | South West | Wales | West midlands | Yorkshire and the Humber |
| Baseline/ before Covid | 0.61% | 0.49% | 0.13% | 0.35% | 0.37% | 0.46% | 0.29% | 0.37% | -0.15% | 0.53% |
| Covid | -0.75% | -0.53% | -0.74% | -0.48% | -0.15% | -0.31% | -0.04% | -0.48% | -0.62% | -0.71% |
| Between Covid and change | 0.31% | 0.21% | 0.51% | 0.60% | 0.16% | 0.35% | 0.42% | 0.25% | 0.15% | 0.51% |
| Implementation period | -0.14% | 0.48% | 0.04% | 0.23% | 0.24% | 0.43% | 0.48% | 0.15% | 0.27% | -0.06% |
| After implementation | 0.86% | 0.85% | 0.69% | 0.68% | 0.77% | 0.85% | 0.49% | 0.72% | 0.89% | 0.56% |
