# Supplementary material
Source: Research Square preprint supplement (doi:10.21203/rs.3.rs-8864800/v1)
Supplement: Supplementary file 8 [file 83983ff8f244f8cc289c23cc.pdf]

Supplementary material 5 Interrupted Time Series analysis – below state pension age and above state pension age

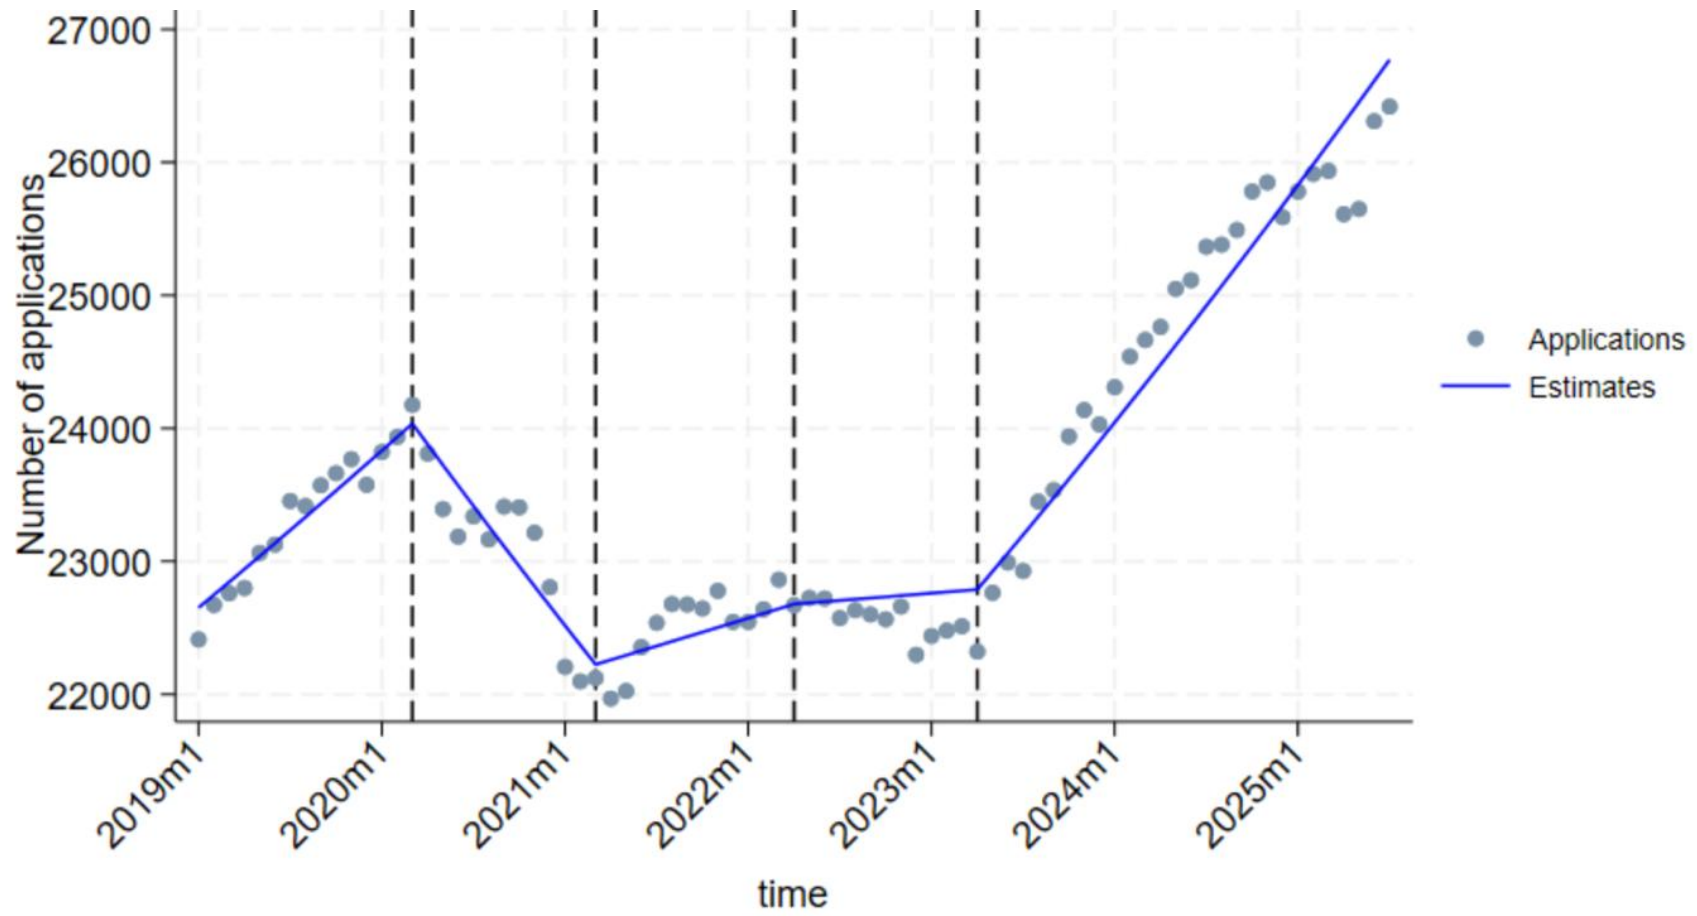

Below state pension age

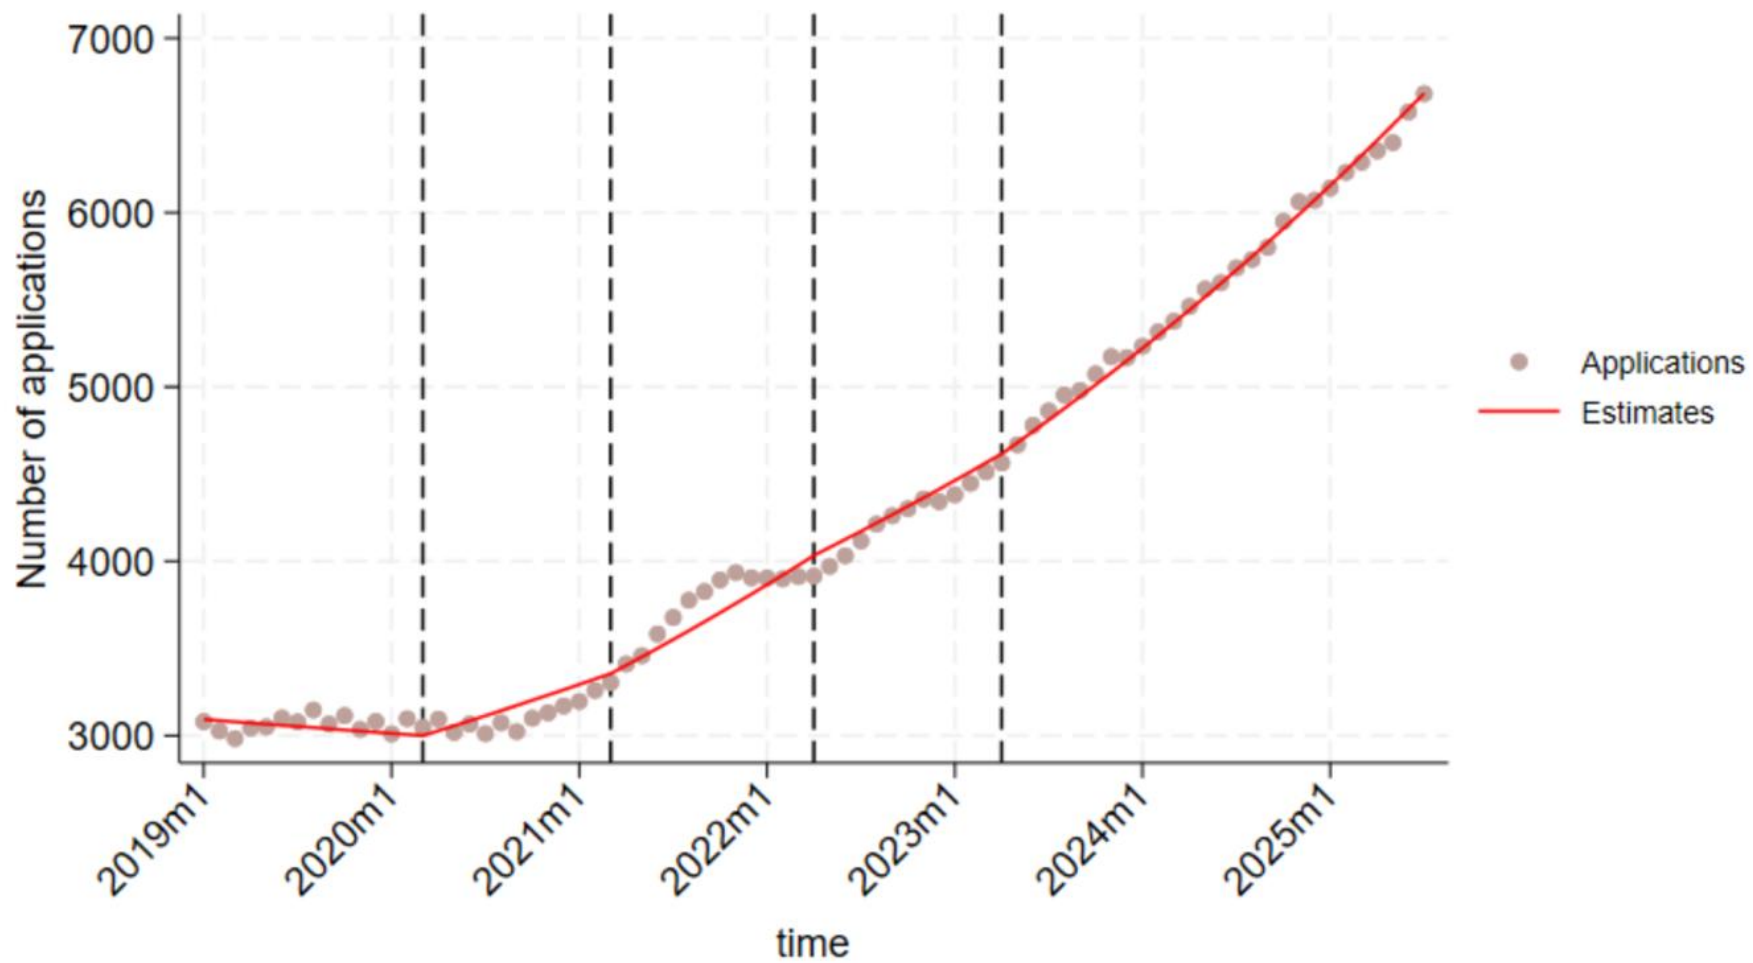

Above state pension age
