# Supplementary material
Source: Research Square preprint supplement (doi:10.21203/rs.3.rs-8864800/v1)
Supplement: Supplementary file 9 [file b99fc34c50155bbc6b6c53a2.docx]

Supplementary material 6 Sensitivity analysis – including Scotland and Abroad regions

Monthly increase including data from Scotland and Abroad regions

|  | Global | Sex | | ICD codes | | Age | |
| --- | --- | --- | --- | --- | --- | --- | --- |
|  |  | Men | Women | Non cancer | Cancer | Pension age | Below pension age |
| Baseline/ before Covid | 0.39% | 0.48% | 0.36% | 1.03% | 0.33% | -0.09% | 0.48% |
| Covid | -0.45% | -0.42% | -0.48% | -0.44% | -0.46% | 0.87% | -0.64% |
| Between Covid and change | 0.39% | 0.40% | 0.38% | 0.48% | 0.38% | 1.59% | 0.19% |
| Implementation period | -0.34% | -0.25% | -0.42% | -0.32% | -0.34% | 0.57% | 0.51% |
| After implementation | 0.48% | 0.56% | 0.41% | 1.11% | 0.38% | 1.03% | 0.35% |

Monthly increase including data from Scotland and Abroad regions

|  | Location | | | | | | | | | | | |
| --- | --- | --- | --- | --- | --- | --- | --- | --- | --- | --- | --- | --- |
|  | London | East Midlands | East of England | Abroad | North East | North West | Scotland | South East | South West | Wales | West midlands | Yorkshire and the Humber | |
| Baseline/ before Covid | 0.63% | 0.51% | 0.15% | 1.11% | 0.37% | 0.40% | 0.76% | 0.48% | 0.31% | 0.39% | -0.13% | 0.63% | |
| Covid | -0.75% | -0.53% | -0.75% | 1.16% | -0.48% | -0.15% | -0.31% | -0.31% | -0.05% | -0.48% | -0.63% | -0.71% | |
| Between Covid and change | 0.31% | 0.21% | 0.51% | -0.67% | 0.60% | 0.16% | 0.56% | 0.35% | 0.42% | 0.25% | 0.14% | 0.51% | |
| Implementation period | -0.14% | 0.48% | 0.05% | 1.09% | 0.23% | 0.25% | -3.86% | 0.43% | 0.48% | 0.15% | 0.27% | -0.06% | |
| After implementation | 0.86% | 0.84% | 0.68% | -1.05% | 0.67% | 0.76% | 0.87% | 0.84% | 0.49% | 0.71% | 0.87% | 0.54% | |
